# Supplementary material for: Small molecules discovered in a pathway screen target the Rho pathway in cytokinesis
Source: Springer Nature journal article supplement (doi:10.1038/nchembio.363), 2010-05-02
Supplement: 41589_2010_BFnchembio363_MOESM19_ESM.mol [file 41589_2010_BFnchembio363_MOESM19_ESM.mol]

  ChemDraw04131006372D

 14 14  0  0  0  0  0  0  0  0999 V2000
   -1.0649   -0.8250    0.0000 C   0  0  0  0  0  0  0  0  0  0  0  0
   -0.3539   -0.4066    0.0000 C   0  0  0  0  0  0  0  0  0  0  0  0
   -0.3607    0.4184    0.0000 C   0  0  0  0  0  0  0  0  0  0  0  0
   -1.0785    0.8250    0.0000 C   0  0  0  0  0  0  0  0  0  0  0  0
   -1.7896    0.4066    0.0000 C   0  0  0  0  0  0  0  0  0  0  0  0
   -1.7827   -0.4184    0.0000 C   0  0  0  0  0  0  0  0  0  0  0  0
   -2.4938   -0.8368    0.0000 S   0  0  0  0  0  0  0  0  0  0  0  0
    0.3504    0.8368    0.0000 C   0  0  0  0  0  0  0  0  0  0  0  0
   -3.2083   -0.4243    0.0000 C   0  0  0  0  0  0  0  0  0  0  0  0
    1.0649    0.4243    0.0000 N   0  0  0  0  0  0  0  0  0  0  0  0
    1.7793    0.8368    0.0000 N   0  0  0  0  0  0  0  0  0  0  0  0
    2.4938    0.4243    0.0000 C   0  0  0  0  0  0  0  0  0  0  0  0
    3.2083    0.8368    0.0000 N   0  0  0  0  0  0  0  0  0  0  0  0
    2.4938   -0.4007    0.0000 S   0  0  0  0  0  0  0  0  0  0  0  0
  1  2  2  0      
  2  3  1  0      
  3  4  2  0      
  4  5  1  0      
  5  6  2  0      
  6  1  1  0      
  6  7  1  0      
  3  8  1  0      
  7  9  1  0      
  8 10  2  0      
 10 11  1  0      
 11 12  1  0      
 12 13  1  0      
 12 14  2  0      
M  END
